# Supplementary material for: Understanding the Oxidative Properties of Nickel Oxyhydroxide in Alcohol Oxidation Reactions
Source: PubMed Central journal article supplement (PMC10334462; doi:10.1021/acscatal.3c01120), 2023-06-12
Supplement: cs3c01120_si_001.pdf [file cs3c01120_si_001.pdf]

# Understanding the oxidative properties of nickel oxyhydroxide in alcohol oxidation reactions

Petrus C. M. Laan <sup>a</sup>, Felix J. de Zwart <sup>a</sup>, Emma M. Wilson <sup>a</sup>, Alessandro Troglia <sup>b</sup>, Olivier C. M. Lugier <sup>a</sup>, Norbert J. Geels <sup>a</sup>, Roland Bliem <sup>b</sup>, Joost N. H. Reek <sup>a</sup>, Bas de Bruin <sup>a</sup>, Gadi Rothenberg <sup>a,\*</sup> and Ning Yan <sup>a,c\*</sup>

<sup>a</sup> Van 't Hoff Institute for Molecular Sciences, University of Amsterdam, Science Park 904, 1098 XH Amsterdam, The Netherlands.

<sup>b</sup> Advanced Research Center for Nanolithography (ARCNL), Science Park 106, 1098XG Amsterdam, The Netherlands.

<sup>c</sup> Key Laboratory of Artificial Micro- and Nano-Structures of Ministry of Education, School of Physics and Technology, Wuhan University, Wuhan, 430072, China.

E-mail: g.rothenberg@uva.nl (GR), ning.yan@whu.edu.cn (NY)

a) Commercial  $\beta$ -Ni(OH)<sub>2</sub>

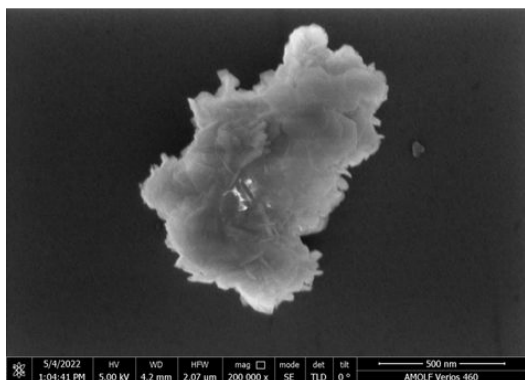

b) Synthesized  $\beta$ -NiOOH

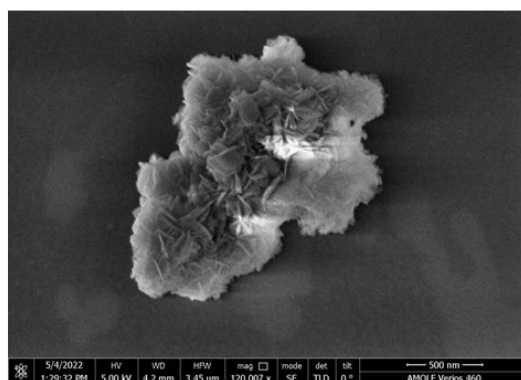

**Figure S1.** SEM images of a) commercial  $\beta$ -Ni(OH)<sub>2</sub> and b) synthesized  $\beta$ -NiOOH. See Figures S2 and S3 for the corresponding EDX mapping.

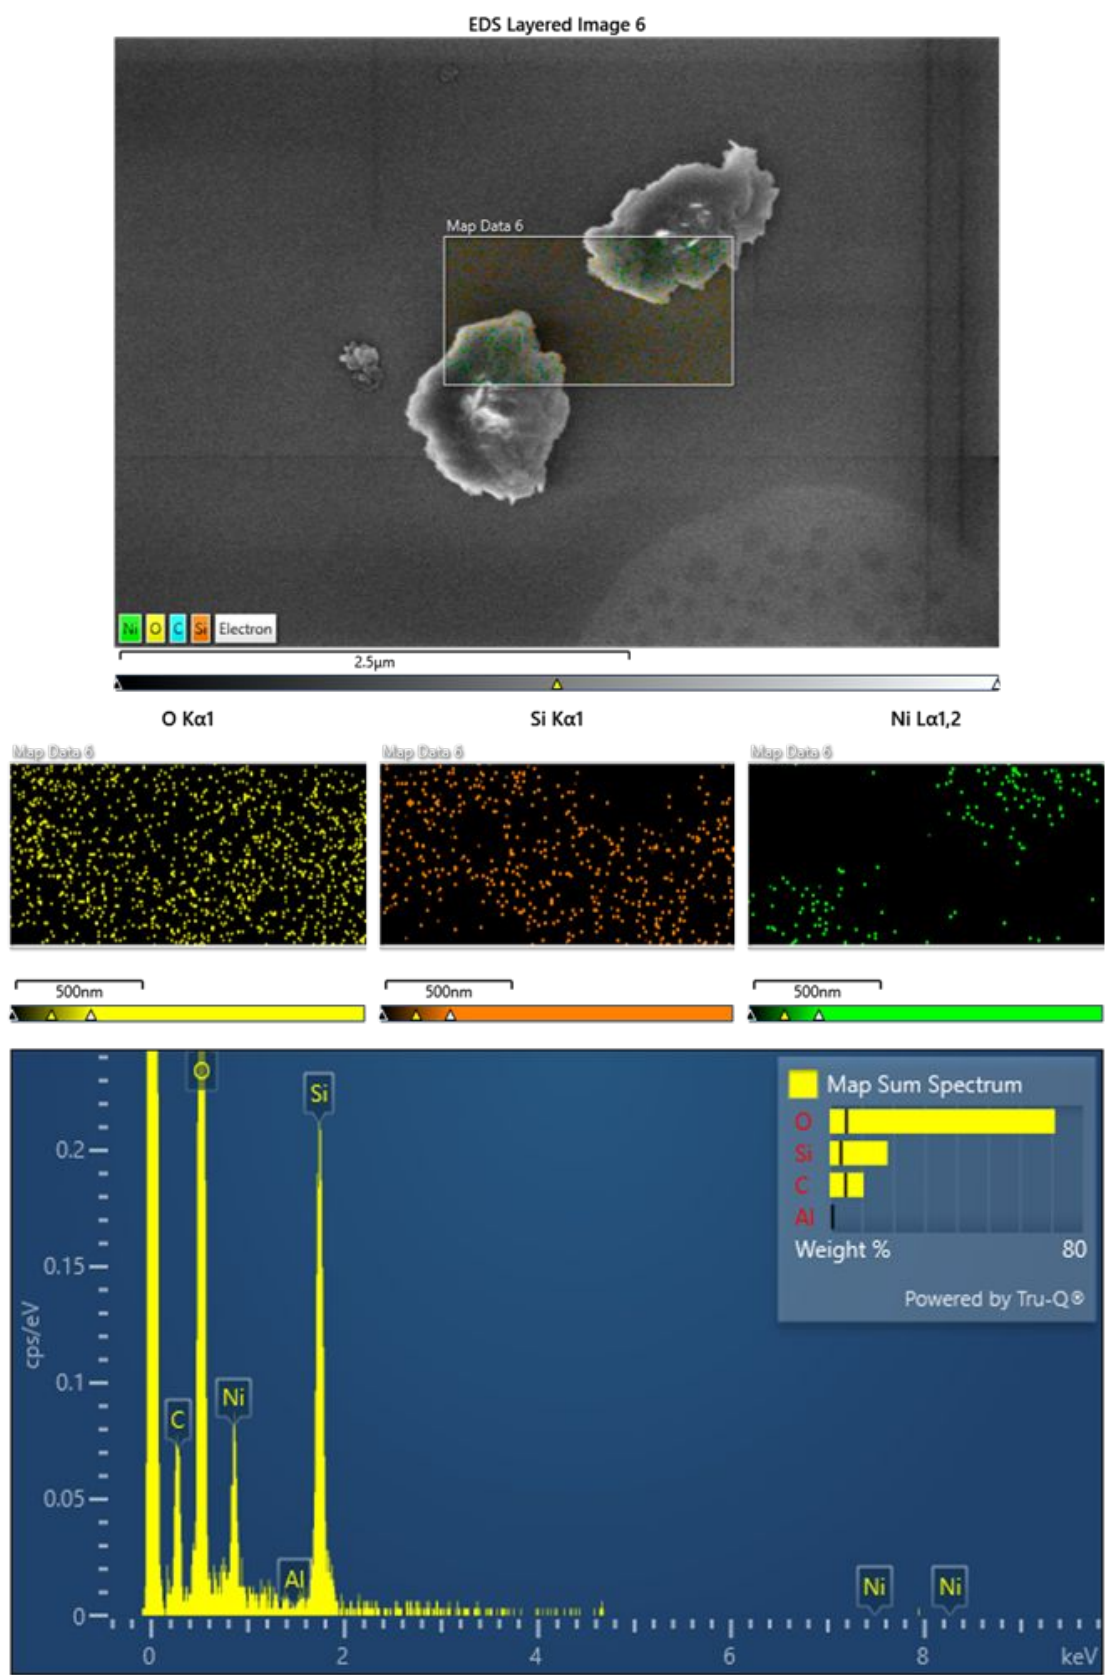

**Figure S2.** SEM image (top) and corresponding EDX mapping (bottom) of commercial  $\beta$ -Ni(OH)<sub>2</sub>.

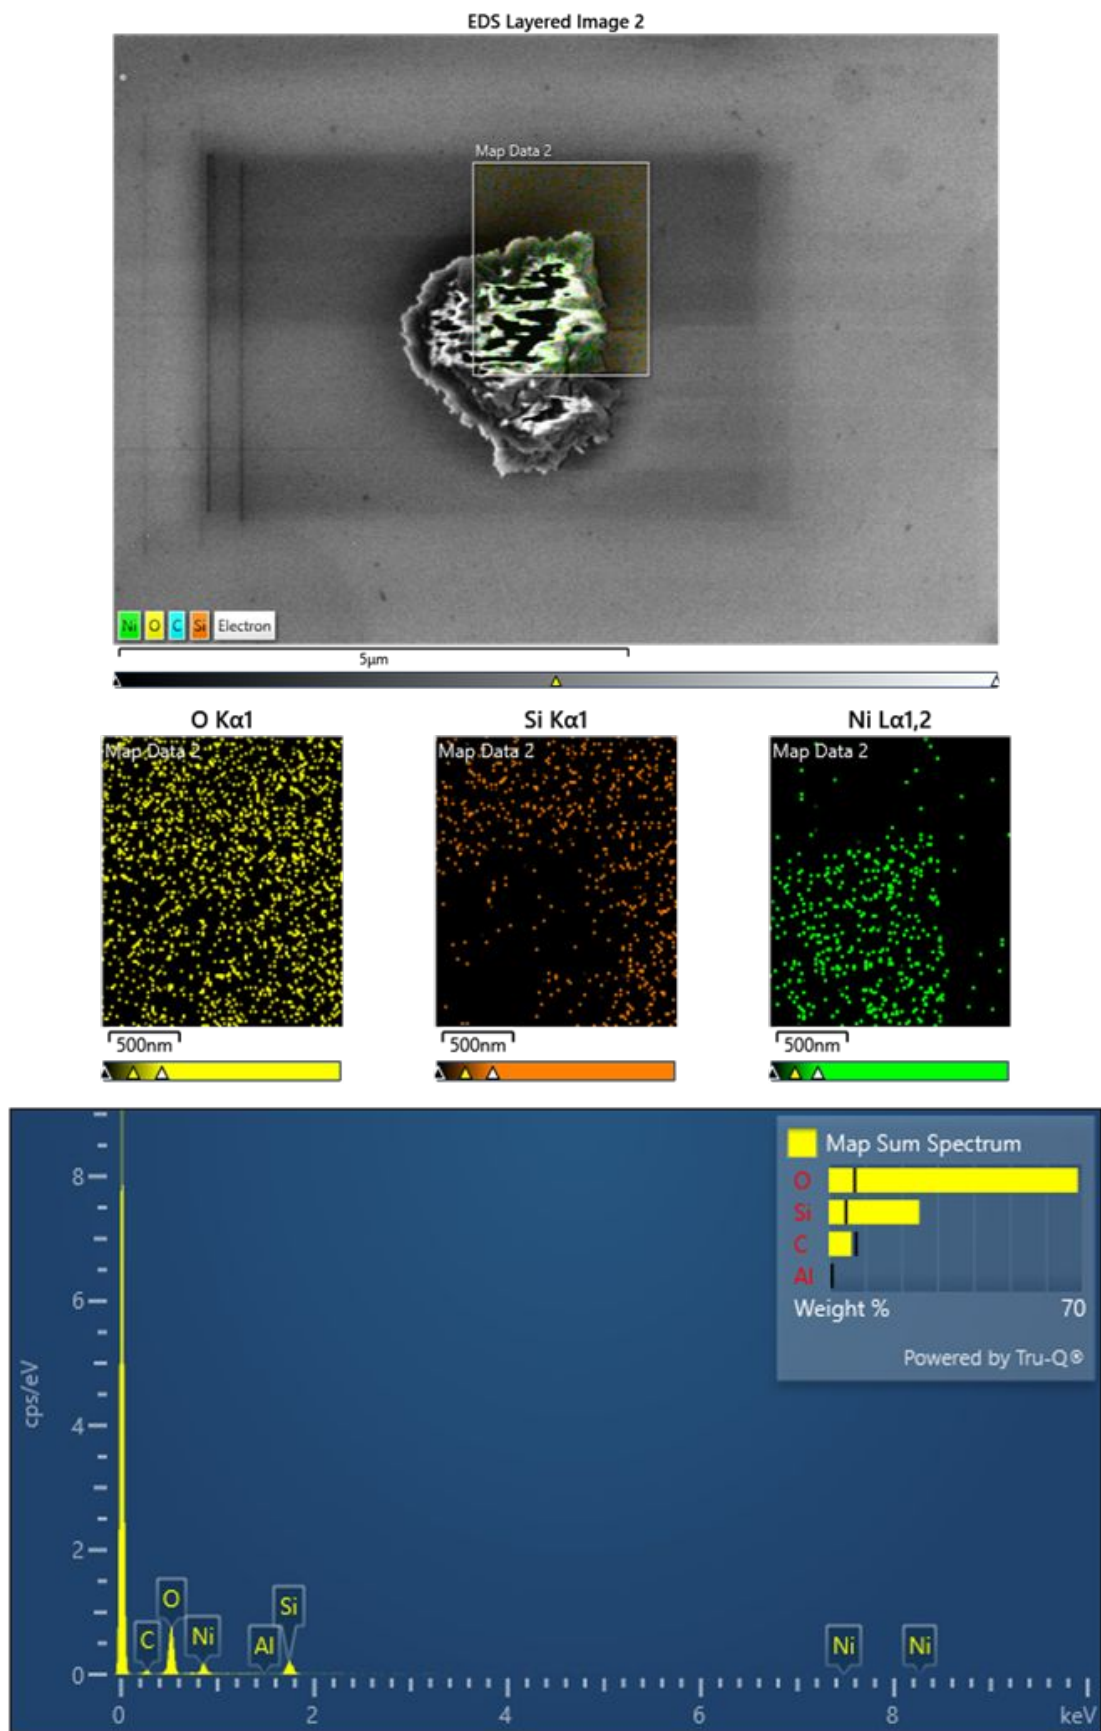

**Figure S3.** SEM image (top) and corresponding EDX mapping (bottom) of synthesized  $\beta$ -NiOOH.

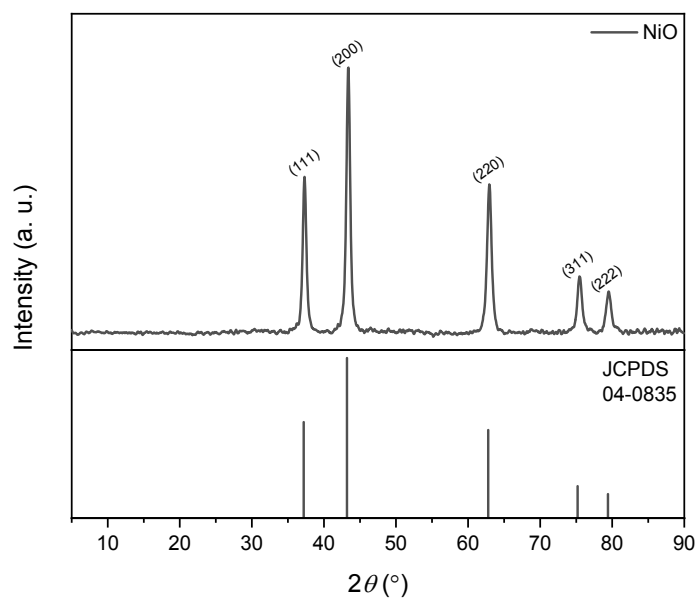

**Figure S4.** pXRD pattern of  $\beta$ -Ni(OH)<sub>2</sub> after TGA-DSC (5 K min<sup>-1</sup>, 25 to 400°C, 20 mL min<sup>-1</sup> Ar) showing the selective formation of NiO.

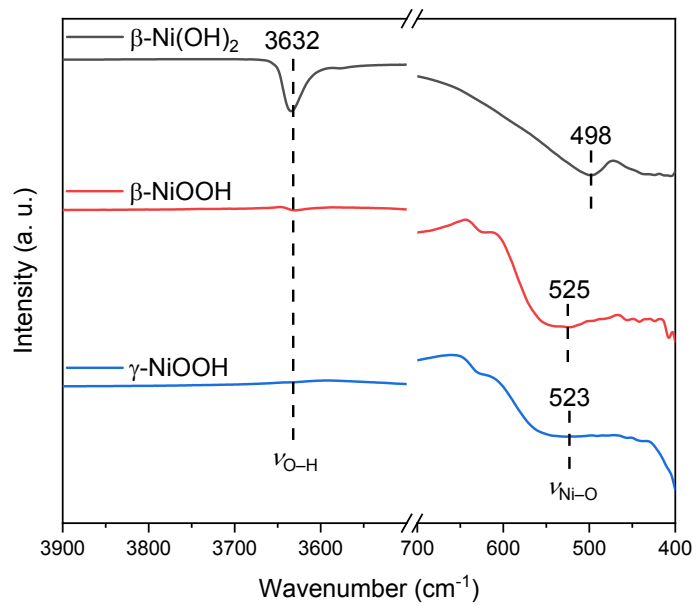

**Figure S5.** Fourier-transform infrared (FT-IR) spectra of β-Ni(OH)<sub>2</sub>, β-NiOOH and γ-NiOOH powder samples.

a) High resolution Ni 2p

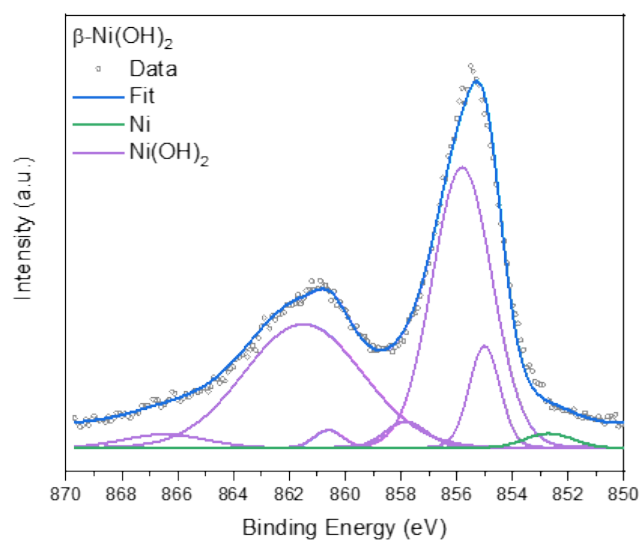

b) Survey

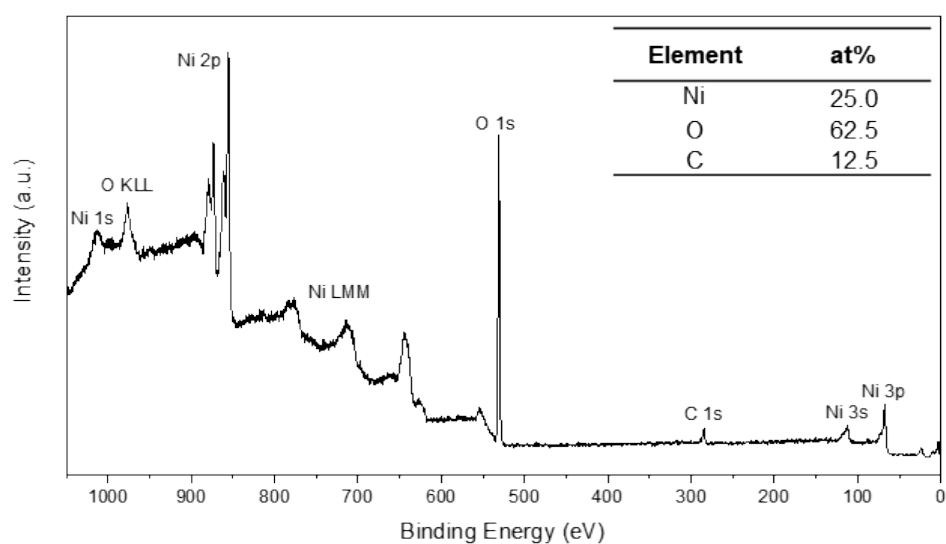

**Figure S6.** High-resolution spectra of the Ni 2p<sub>3/2</sub> region (a) and survey XPS spectra (b) of commercial β-Ni(OH)<sub>2</sub>. Inset shows the atomic ratio of the observed elements, not considering the difference in probing depth of the different core levels.

a) High resolution Ni 2p

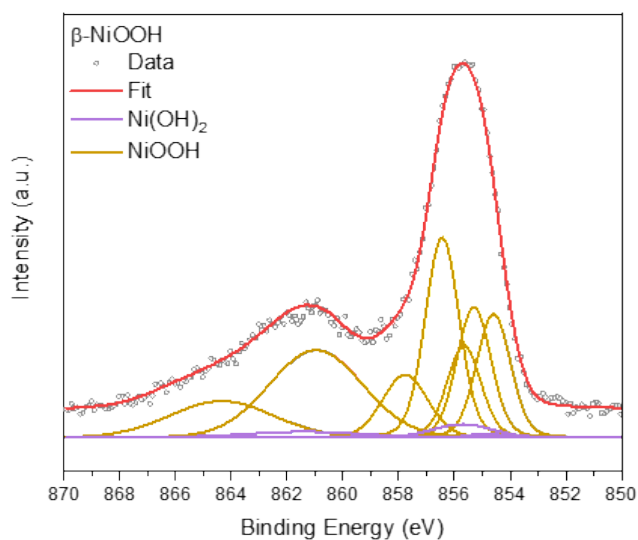

b) Survey

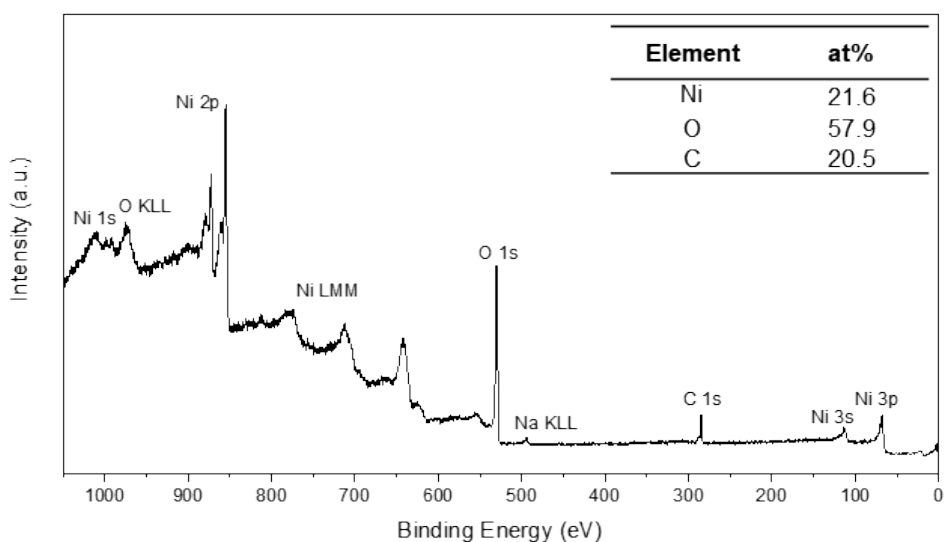

**Figure S7.** High-resolution spectra of the Ni 2p<sub>3/2</sub> region (a) and survey XPS spectra (b) of synthesized  $\beta$ -NiOOH. Inset shows the atomic ratio of the observed elements, not considering the difference in probing depth of the different core levels.



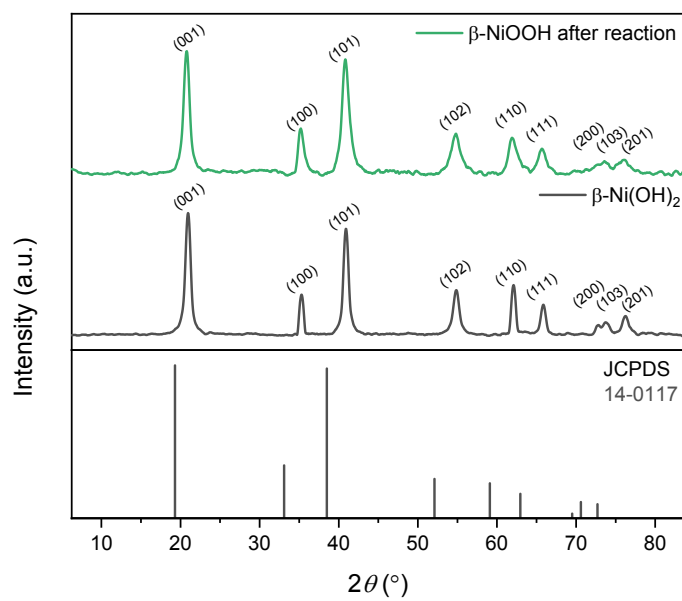

**Figure S8.** pXRD pattern of  $\beta$ -NiOOH (top, purple trace) after reaction with benzyl alcohol at room temperature in toluene for 1 hour, commercial  $\beta$ -Ni(OH)<sub>2</sub> (middle, black trace) and JCPDS line spectrum of  $\beta$ -Ni(OH)<sub>2</sub> (bottom, black trace).

a) High resolution Ni 2p

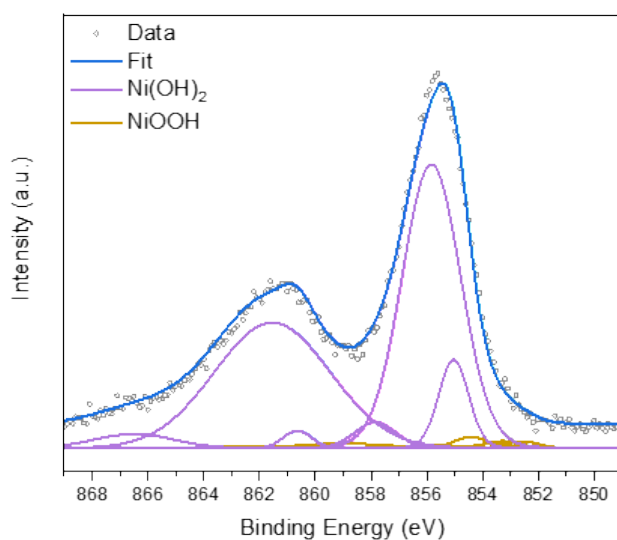

b) Survey

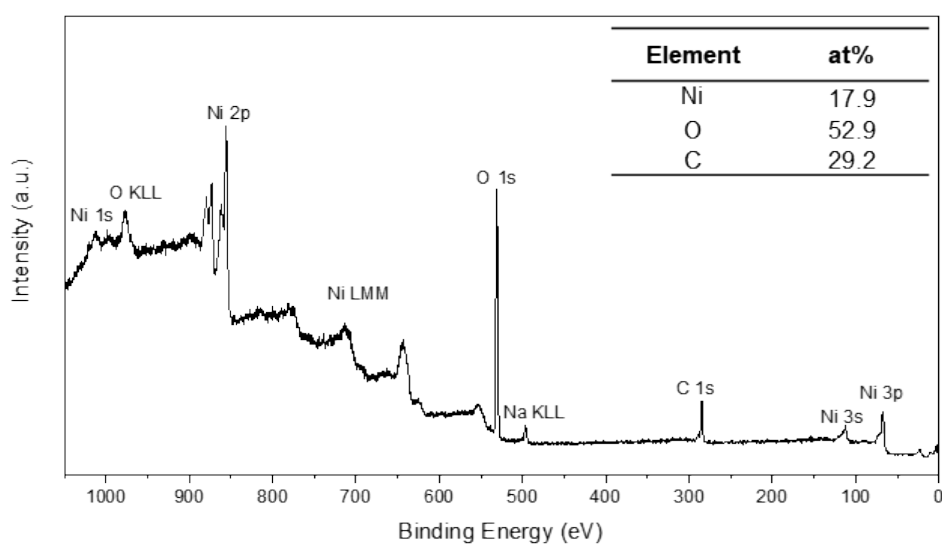

**Figure S9.** High-resolution spectra of the Ni 2p<sub>3/2</sub> region (a) and survey XPS spectra (b) of  $\beta$ -NiOOH after reaction with benzyl alcohol showing the selective and quantitative conversion to  $\beta$ -Ni(OH)<sub>2</sub>. Inset shows the atomic ratio of the observed elements, not considering the difference in probing depth of the different core levels.

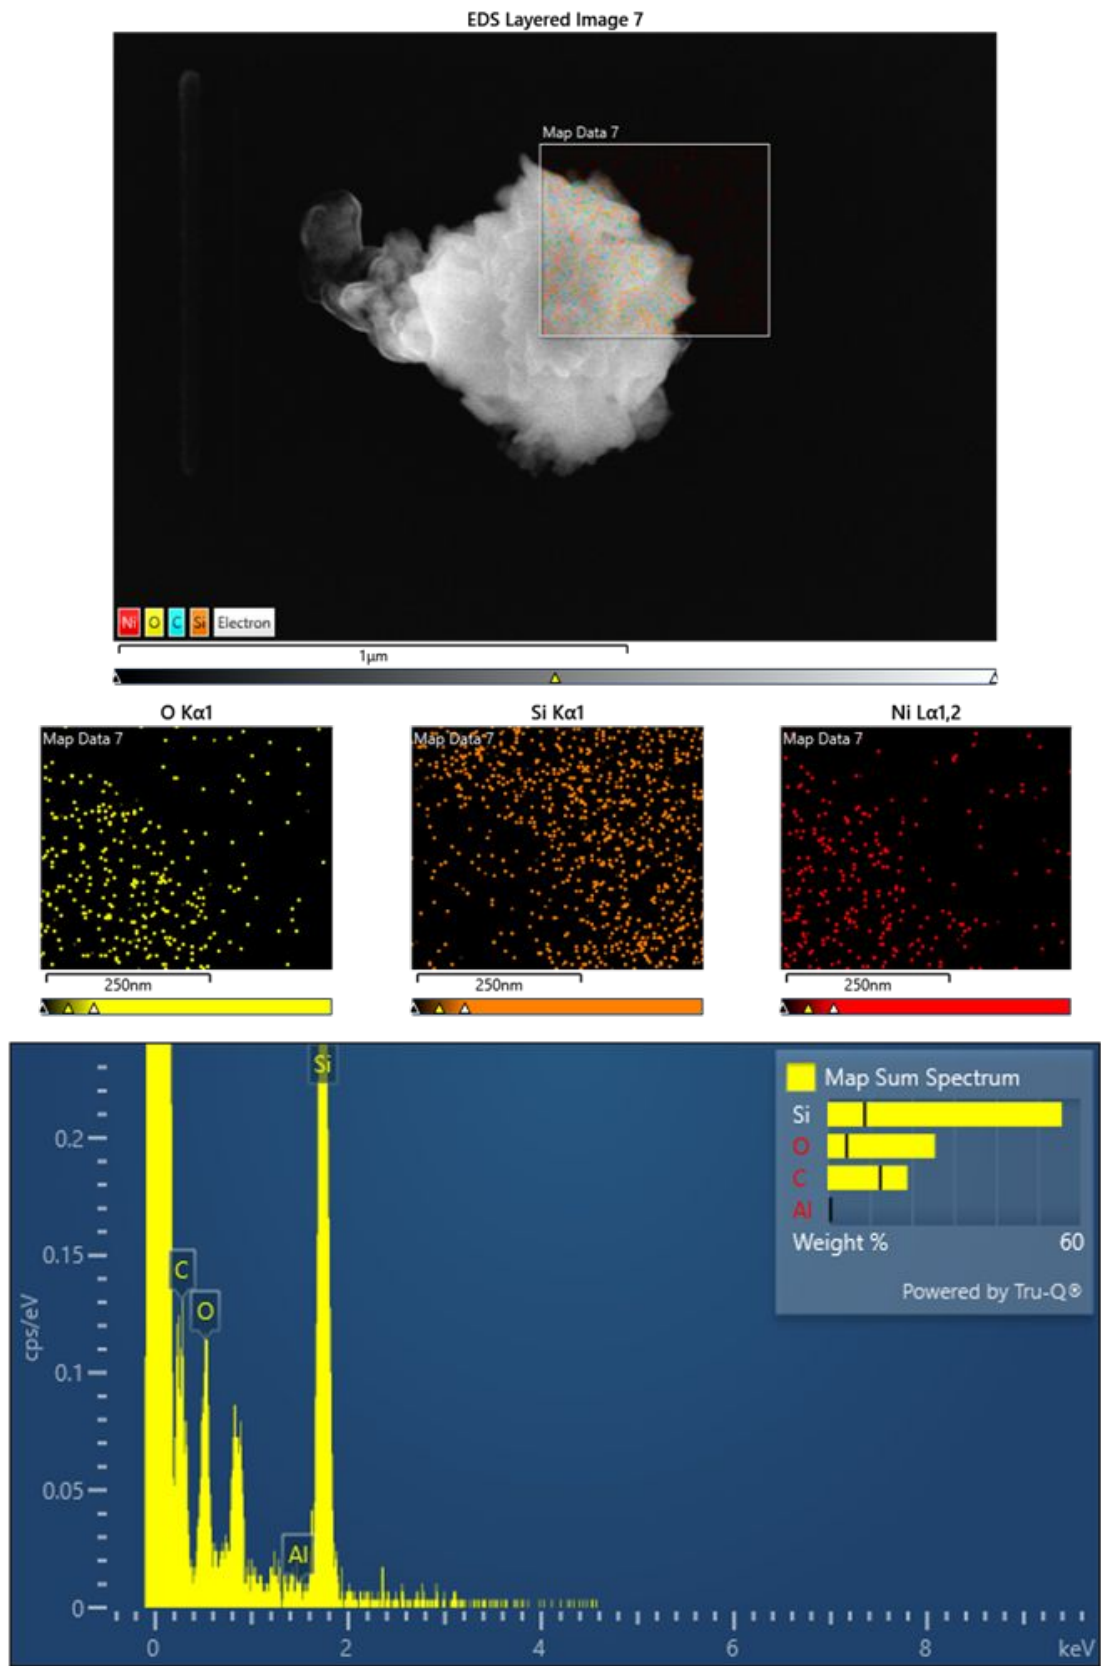

**Figure S10.** SEM image (top) and corresponding EDX mapping (bottom) of  $\beta$ -

NiOOH after reaction with benzyl alcohol at room temperature in toluene for 1 hour.

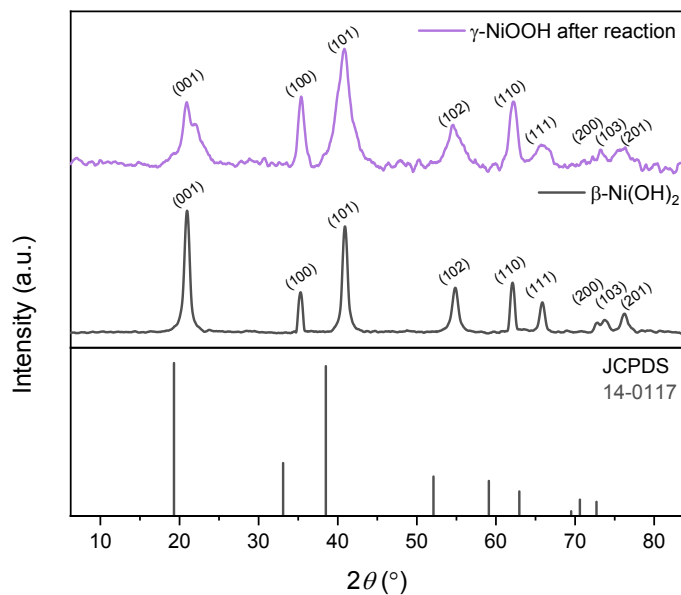

**Figure S11.** pXRD pattern of  $\gamma$ -NiOOH (top, purple trace) after reaction with benzyl alcohol at room temperature in toluene for 1 hour, commercial  $\beta$ -Ni(OH)<sub>2</sub> (middle, black trace) and JCPDS line spectrum of  $\beta$ -Ni(OH)<sub>2</sub> (bottom, black trace).

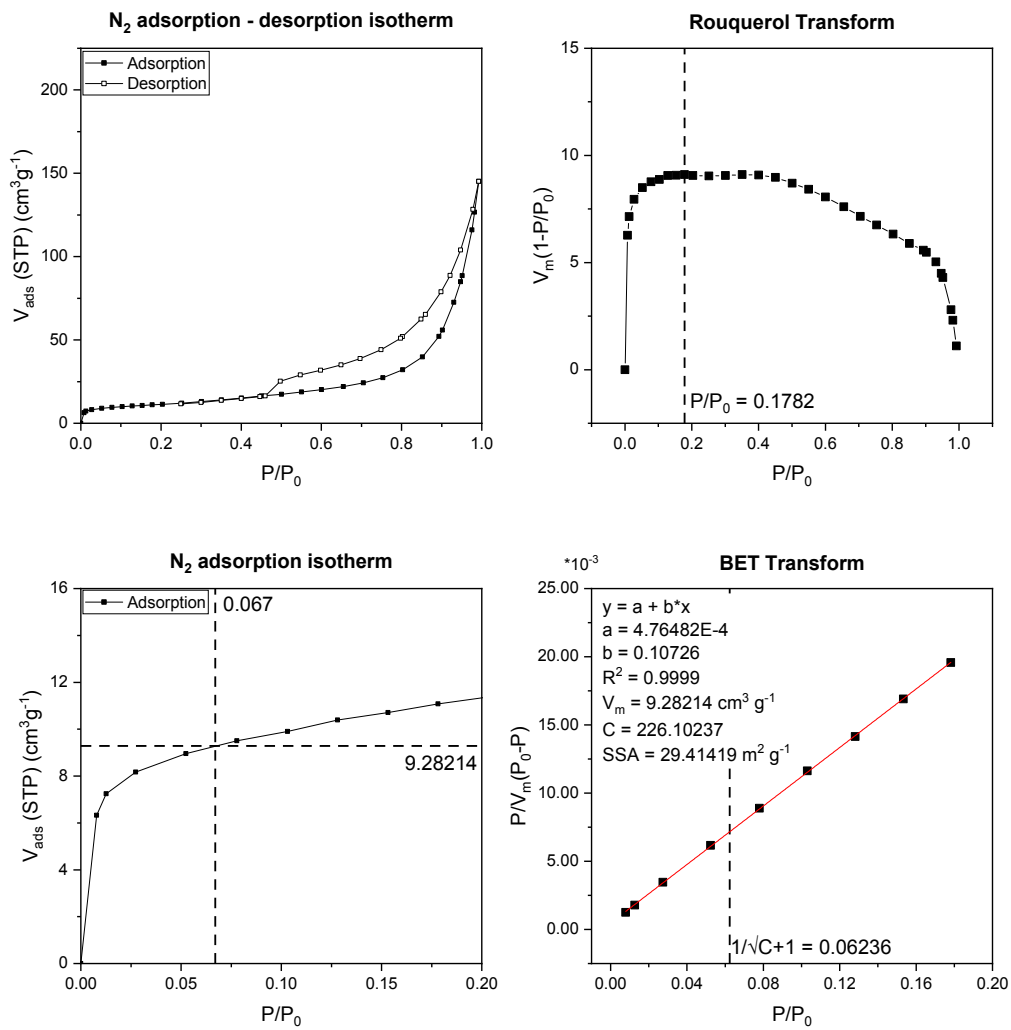

**Figure S12.** Porosity analysis of  $\beta$ -Ni(OH)<sub>2</sub>. (a) N<sub>2</sub> adsorption and desorption isotherms at 77 K; (b) Rouquerol transform plot; (c) zoom-in of the N<sub>2</sub> adsorption isotherm at 77 K and (d) BET transform plot.

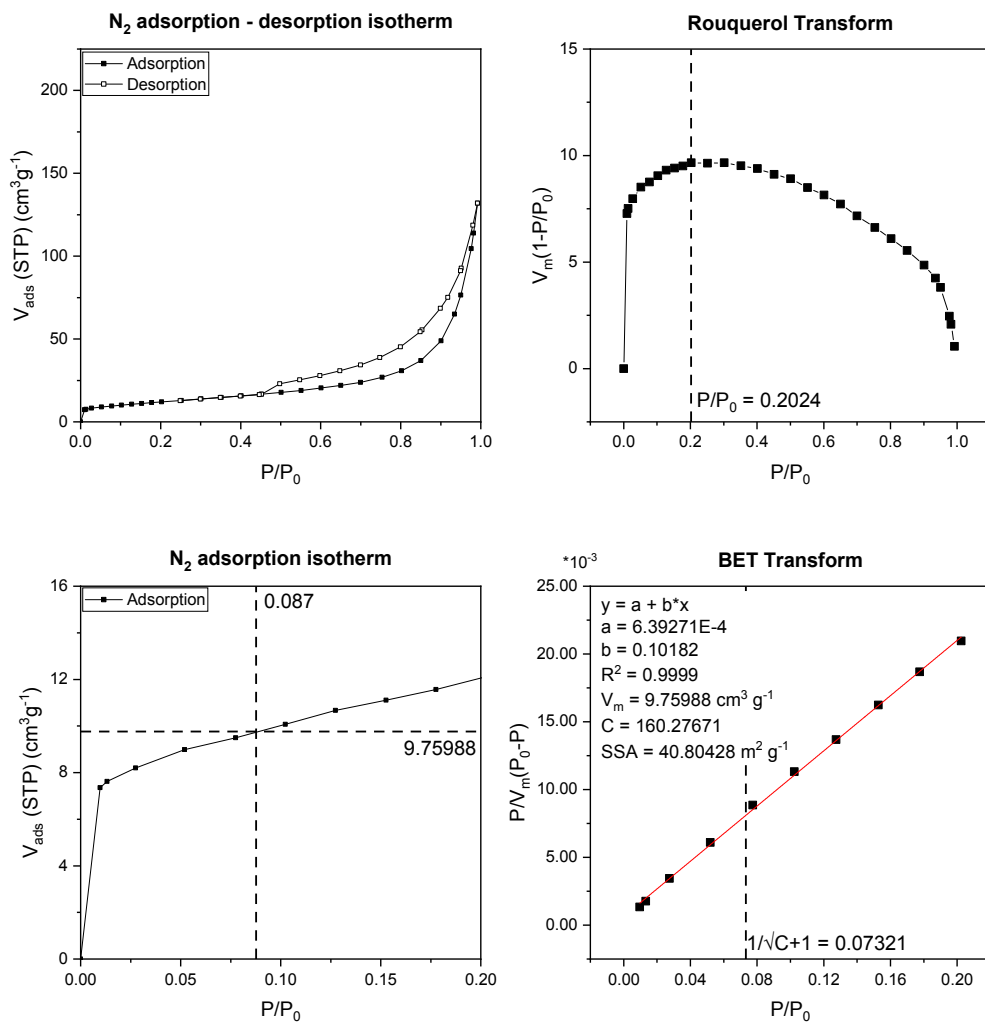

**Figure S13.** Porosity analysis of  $\beta$ -NiOOH. (a)  $N_2$  adsorption and desorption isotherms at 77 K; (b) Rouquerol transform plot; (c) zoom-in of the  $N_2$  adsorption isotherm at 77 K and (d) BET transform plot.

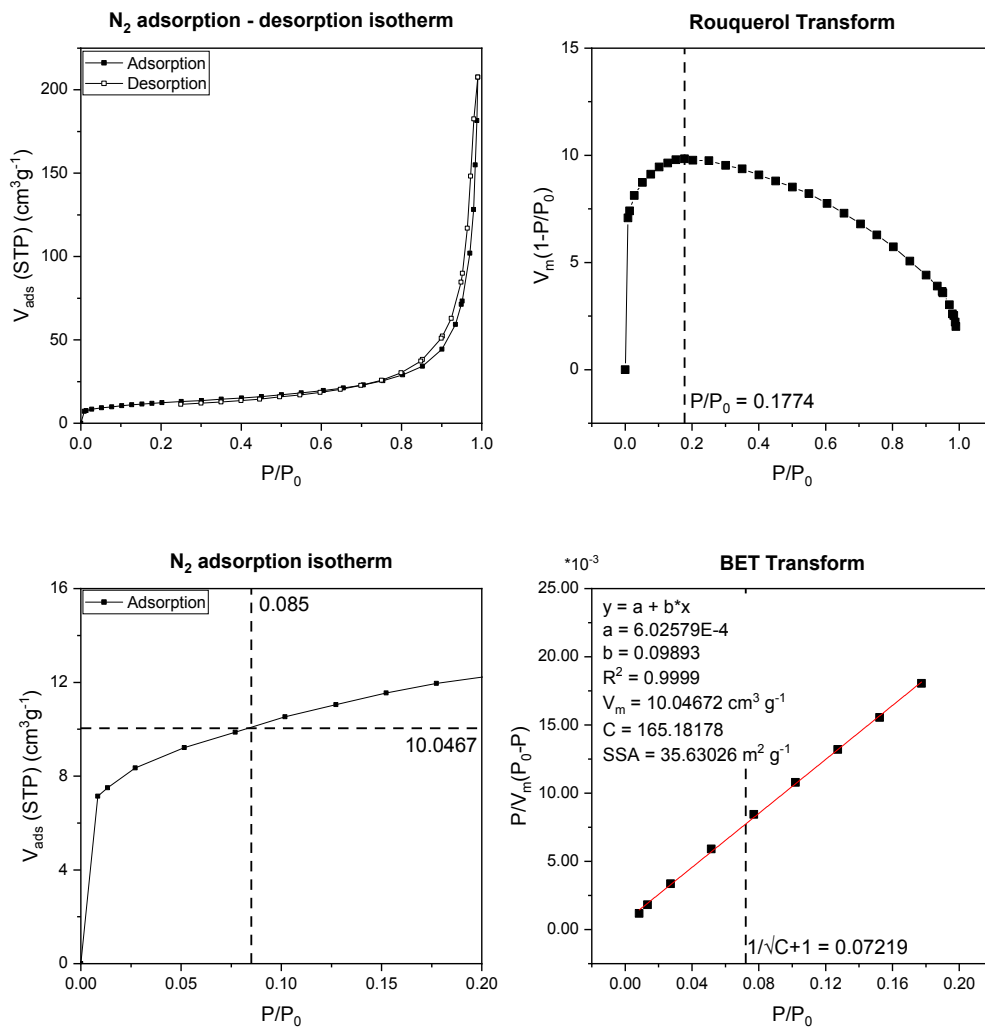

**Figure S14.** Porosity analysis of  $\gamma$ -NiOOH. (a)  $N_2$  adsorption and desorption isotherms at 77 K; (b) Rouquerol transform plot; (c) zoom-in of the  $N_2$  adsorption isotherm at 77 K and (d) BET transform plot.
